# Supplementary material for: TRiC/CCT chaperonins are essential for organ growth by interacting with insulin/TOR signaling in Drosophila
Source: PubMed Central journal article supplement (PMC6756063; doi:10.1038/s41388-019-0754-1), 2019-02-21

# Supplementary Figure 7

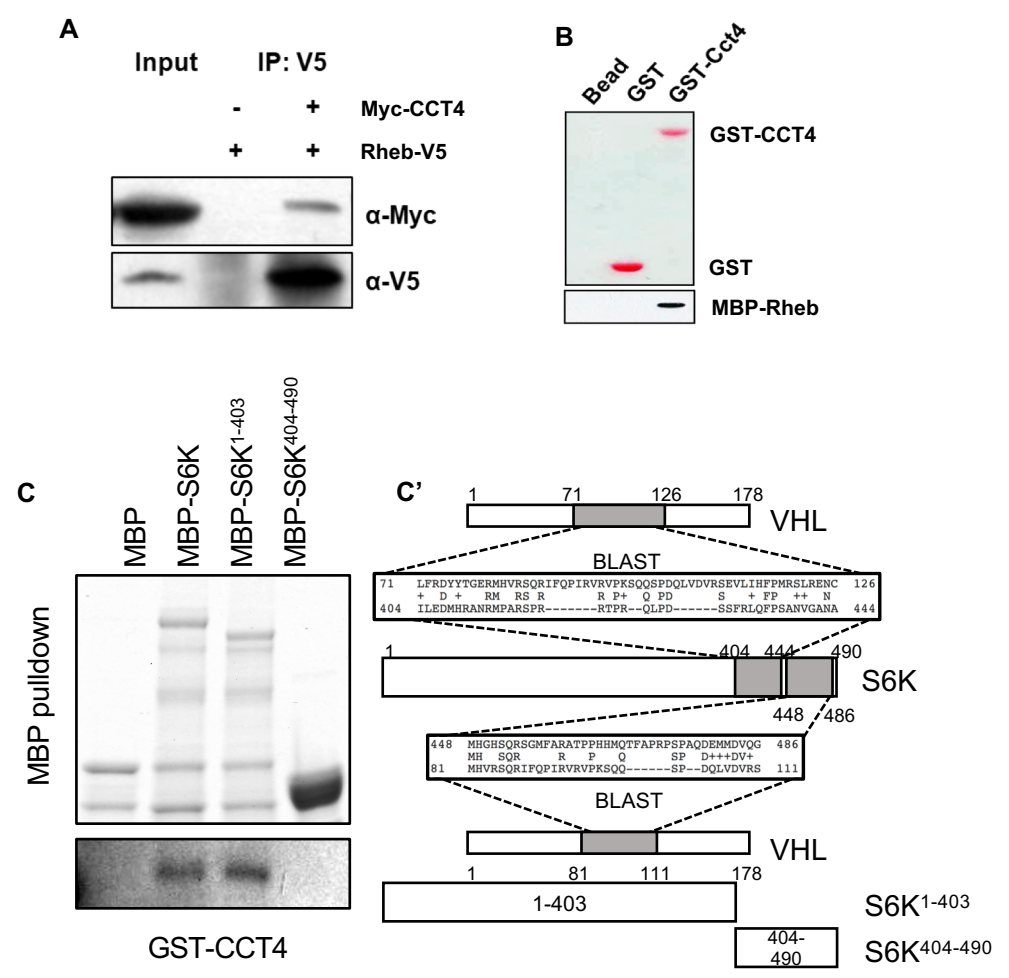

Supplement: 41388_2019_754_MOESM8_ESM.pdf [file 41388_2019_754_MOESM8_ESM.pdf]
